# Supplementary material for: In-situ Preparation of Excellent Temperature Response Hydrogels with SA/PAM/PPy System and its Application in Motion Monitoring
Source: Research Square preprint supplement (doi:10.21203/rs.3.rs-7742823/v1), 2025-10-16
Supplement: Supplementary file 1 [file 058944f4287722e8b2bd3d33.docx]

**In-situ Preparation of Excellent Temperature Response Hydrogels with SA/PAM/PPy System and its Application in Motion Monitoring**

Qiaofeng Wei1, Liang Li1,2, Xiaowen Cheng1, Yuan Zeng1, Yongqiang Wang1, Guangguo Tian1,2, Shuping Liu1,2, Xilin Liao1,2, Shujing Li1,2, Rangtong Liu1,2*

1 Zhongyuan University of Technology, Zhengzhou 451191, China.

2 Collaborative Innovation Center of Advanced Textile Equipment Jointly Constructed by Henan Province and Ministry of Education, Zhengzhou 451191, China.

Correspondence to Prof. Rangtong Liu (Email: ranton@126.com).


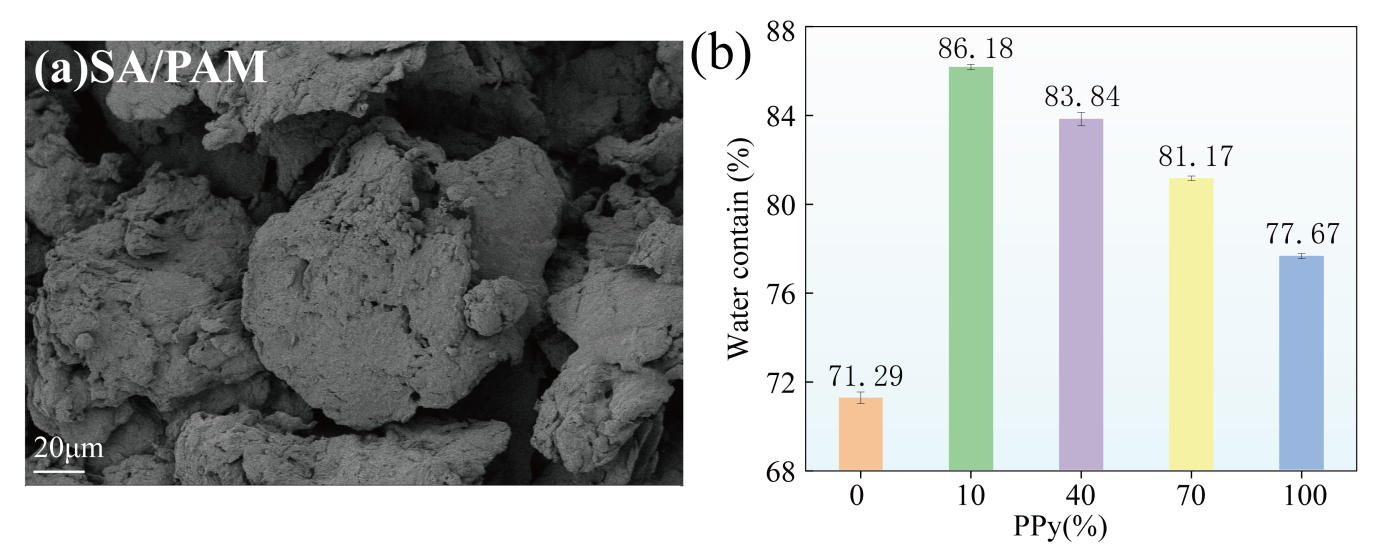


**Fig. S1.** (a) SEM images of SA/PAM hydrogel (b) Comparison of the Water Content in SA/PAM/PPy Hydrogels


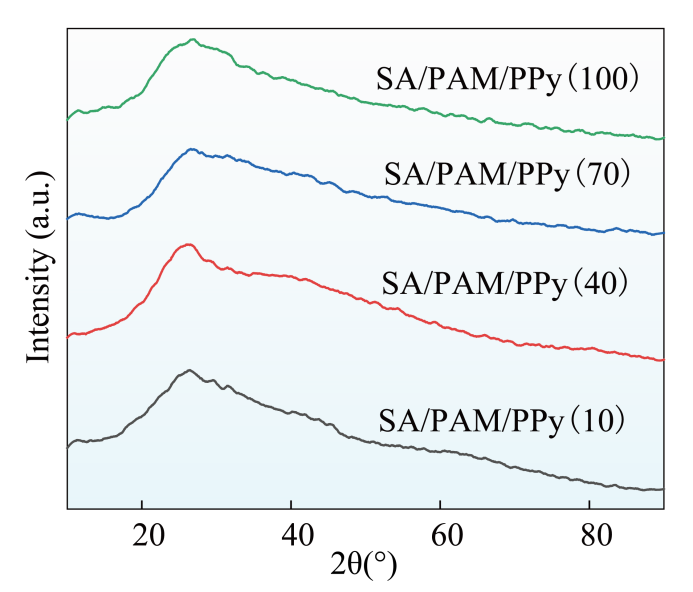


**Fig. S2.** XRD patterns of SA/PAM/PPy hydrogels.

**Table S1.** Thermal Decomposition Data of SA/PAM/PPy Hydrogels

| 样品 | Td/℃ | T1max/℃ | T2max/℃ | 700℃残炭率/% |
| --- | --- | --- | --- | --- |
| SA/PAM | 110.70 | 255.30 | 333.50 | 22.36 |
| SA/PAM/PPy(10) | 161.55 | 239.44 | 391.87 | 4 4.80 |
| SA/PAM/PPy(40) | 132.83 | 239.93 | 387.88 | 41.81 |
| SA/PAM/PPy(70) | 164.00 | 240.54 | 388.50 | 39.32 |
| SA/PAM/PPy(100) | 161.81 | 244.02 | 387.84 | 45.53 |


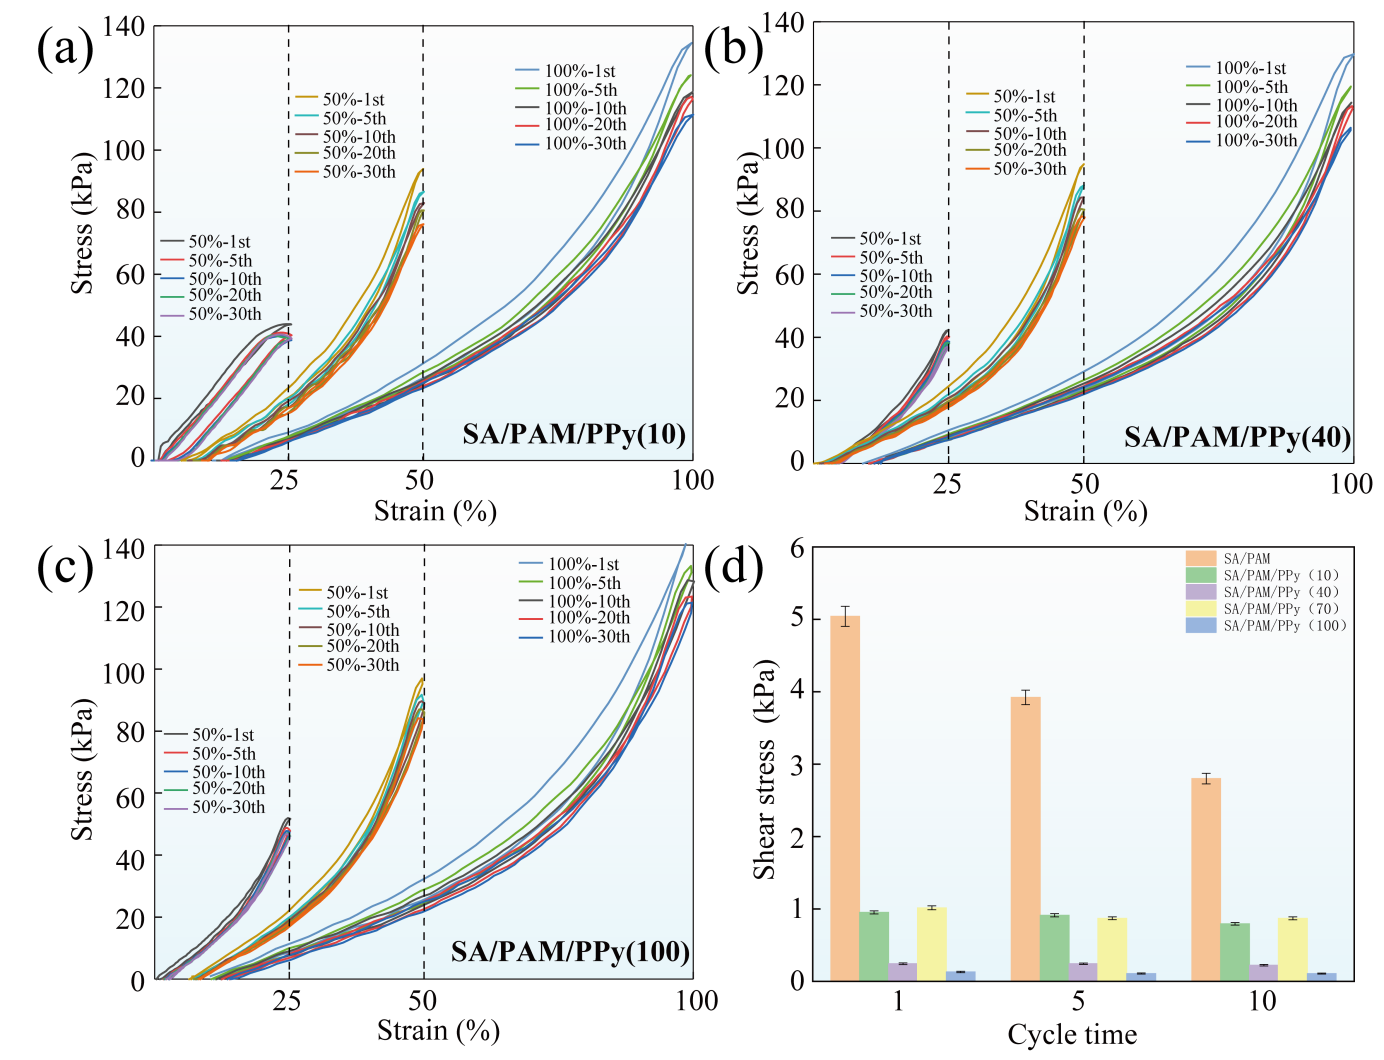


**Fig. S3.** (a~c) Cyclic tensile curves of SA/PAM/PPy hydrogels; (d) Adhesion comparison of SA/PAM/PPy hydrogels on Copper sheet.


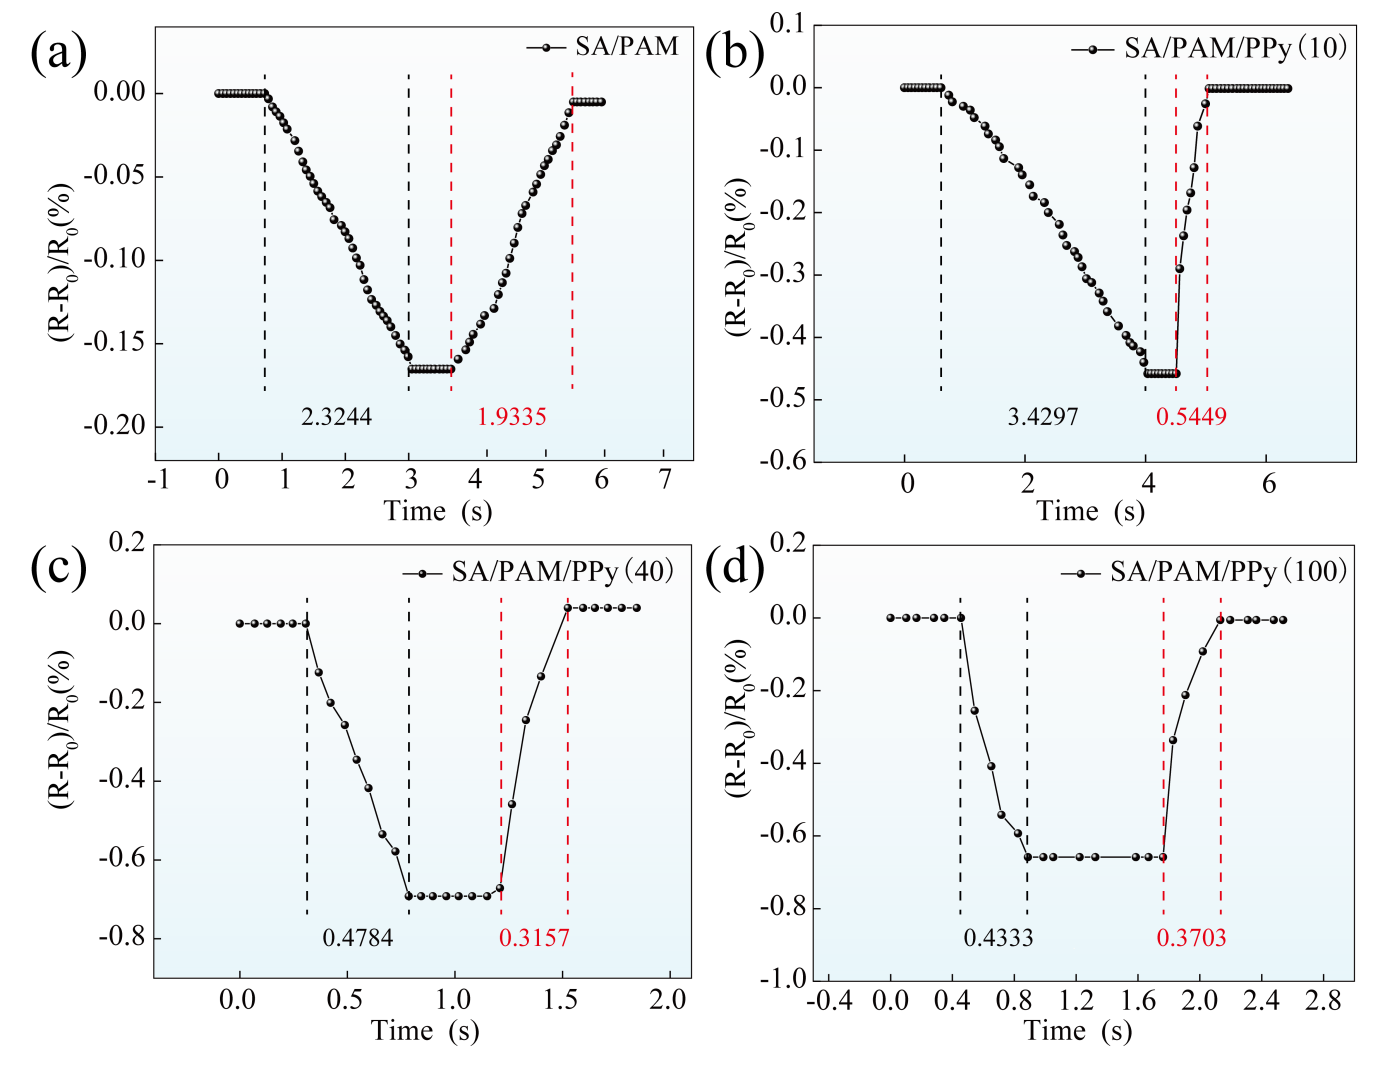


**Fig. S4.** (a~d) Responsiveness of SA/PAM/PPy
